# Supplementary material for: Variations of Bacterial Community Composition and Functions in an Estuary Reservoir during Spring and Summer Alternation
Source: PubMed Central journal article supplement (PMC6116017; doi:10.3390/toxins10080315), 2018-08-06
Supplement: toxins-10-00315-s001.pdf [file toxins-10-00315-s001.pdf]

# Supplementary Materials: Variations of Bacterial Community Composition and Functions in an Estuary Reservoir during Spring and Summer Alternation

Zheng Xu, Shu Harn Te, Cong Xu, Yiliang He and Karina Yew-Hoong Gin

**Table S1.** Statistics of assembly result.

| Sample                | Kmer | Contigs | Contigs     |          |          |          |          |
|-----------------------|------|---------|-------------|----------|----------|----------|----------|
|                       |      |         | bases (bp)  | N50 (bp) | N90 (bp) | Max (bp) | Min (bp) |
| 2014-05<br>(Internal) | K41  | 157,940 | 170,913,569 | 1,167    | 572      | 49,563   | 500      |
| 2014-06<br>(Internal) | K41  | 153,619 | 184,578,271 | 1,366    | 592      | 151,342  | 500      |
| 2014-06<br>(Exit)     | K41  | 219,616 | 259,171,705 | 1,321    | 589      | 138,130  | 500      |
| 2014-07<br>(Exit)     | K41  | 158,160 | 193,131,450 | 1,393    | 591      | 78,191   | 500      |

**Table S2.** Statistics of predicted ORF.

| Sample                | ORFs    | Total length (bp) | Average length (bp) | Max (bp) | Min (bp) |
|-----------------------|---------|-------------------|---------------------|----------|----------|
| 2014-05<br>(Internal) | 260,724 | 142,152,317       | 545                 | 18,716   | 500      |
| 2014-06<br>(Internal) | 273,994 | 152,791,055       | 558                 | 13,839   | 500      |
| 2014-06 (Exit)        | 380,390 | 222,162,183       | 584                 | 27,486   | 500      |
| 2014-07 (Exit)        | 294,093 | 171,556,187       | 583                 | 33,918   | 500      |

**Table S3.** Statistics of clean data.

| Sample                | Clean reads | Clean bases (bp) | Percent in raw reads (%) | Percent in raw bases (%) |
|-----------------------|-------------|------------------|--------------------------|--------------------------|
| 2014-05<br>(Internal) | 71,613,537  | 10,415,994,537   | 95.73                    | 92.82                    |
| 2014-06<br>(Internal) | 62,711,213  | 9,109,524,058    | 95.28                    | 92.27                    |
| 2014-06 (Exit)        | 73,004,426  | 10,620,530,364   | 95.63                    | 92.74                    |
| 2014-07 (Exit)        | 68,901,847  | 9,989,982,838    | 95.06                    | 91.89                    |
